# Supplementary material for: Homozygous duplication identified by whole genome sequencing causes LRBA deficiency
Source: PubMed Central journal article supplement (PMC8602677; doi:10.1038/s41525-021-00263-z), 2021-11-18
Supplement: 41525_2021_263_MOESM1_ESM.pdf [file 41525_2021_263_MOESM1_ESM.pdf]

## **SUPPLEMENTARY DATA**

### **Homozygous duplication identified by whole genome sequencing causes *LRBA* deficiency**

Daniele Merico<sup>a,b</sup>, Yehonatan Pasternak<sup>d,e,f</sup>, Mehdi Zarrei<sup>a</sup>, Edward J. Higginbotham<sup>a</sup>, Bhooma Thiruvahindrapuram<sup>a</sup>, Ori Scott<sup>d,e,f</sup>, Jessica Willett-Pachul<sup>e</sup>, Eyal Grunebaum<sup>e,f</sup>, Julia Upton<sup>e,f</sup>, Adelle Atkinson<sup>e,f</sup>, Vy H.D. Kim<sup>d</sup>, Elbay Aliyev<sup>g</sup>, Khalid Fakhro<sup>f,h</sup>, Stephen W. Scherer<sup>a,c</sup>, Chaim M. Roifman<sup>d,e, f\*</sup>

\* corresponding author

- a - The Centre for Applied Genomics (TCAG), Program in Genetics and Genome Biology, The Hospital for Sick Children, Toronto, M5G 0A4, Ontario, Canada
- b - Deep Genomics Inc., Toronto, M5G 1M1, Ontario, Canada
- c - Department of Molecular Genetics, University of Toronto, Toronto, M5S 1A8, Ontario, Canada; McLaughlin Centre, University of Toronto, Toronto, M5G 0A4, Ontario, Canada
- d - Canadian Center for Primary Immunodeficiency and the Jeffrey Modell Research Laboratory for the Diagnosis of Primary Immunodeficiency, Toronto, M5G1X8, Ontario, Canada
- e - Division of Immunology and Allergy, Department of Paediatrics, The Hospital for Sick Children, Toronto, M5G 1X8, Ontario, Canada
- f - University of Toronto, Toronto, M5S 1A8, Ontario, Canada
- g - Department of Human Genetics, Sidra Medicine, Doha, Qatar
- h - Department of Genetic Medicine, Weill-Cornell Medical College, Doha, Qatar

#### **Address for Correspondence:**

Dr. Chaim M. Roifman, CM, MD, FRCPC, FCACB. Hospital for Sick Children, University of Toronto, Toronto, Ontario, Canada

Email: [chaim.roifman@sickkids.ca](mailto:chaim.roifman@sickkids.ca) Phone: 416-813-8629 Fax: 416-813-5932

## **FIGURE LEGENDS**

**Supplementary Figure 1:** GTEx junction analysis showing that junction 29, skipping exon 39, is predominantly expressed in all tissues.

**Supplementary Figure 2:** Probes for different SNP and CGH array platforms in the duplicated genomic region, as provided by DGV.

**Supplementary Data 1:** Prioritized rare SNVs and indels from WGS.

**Supplementary Data 2:** Rare CNVs from WGS.

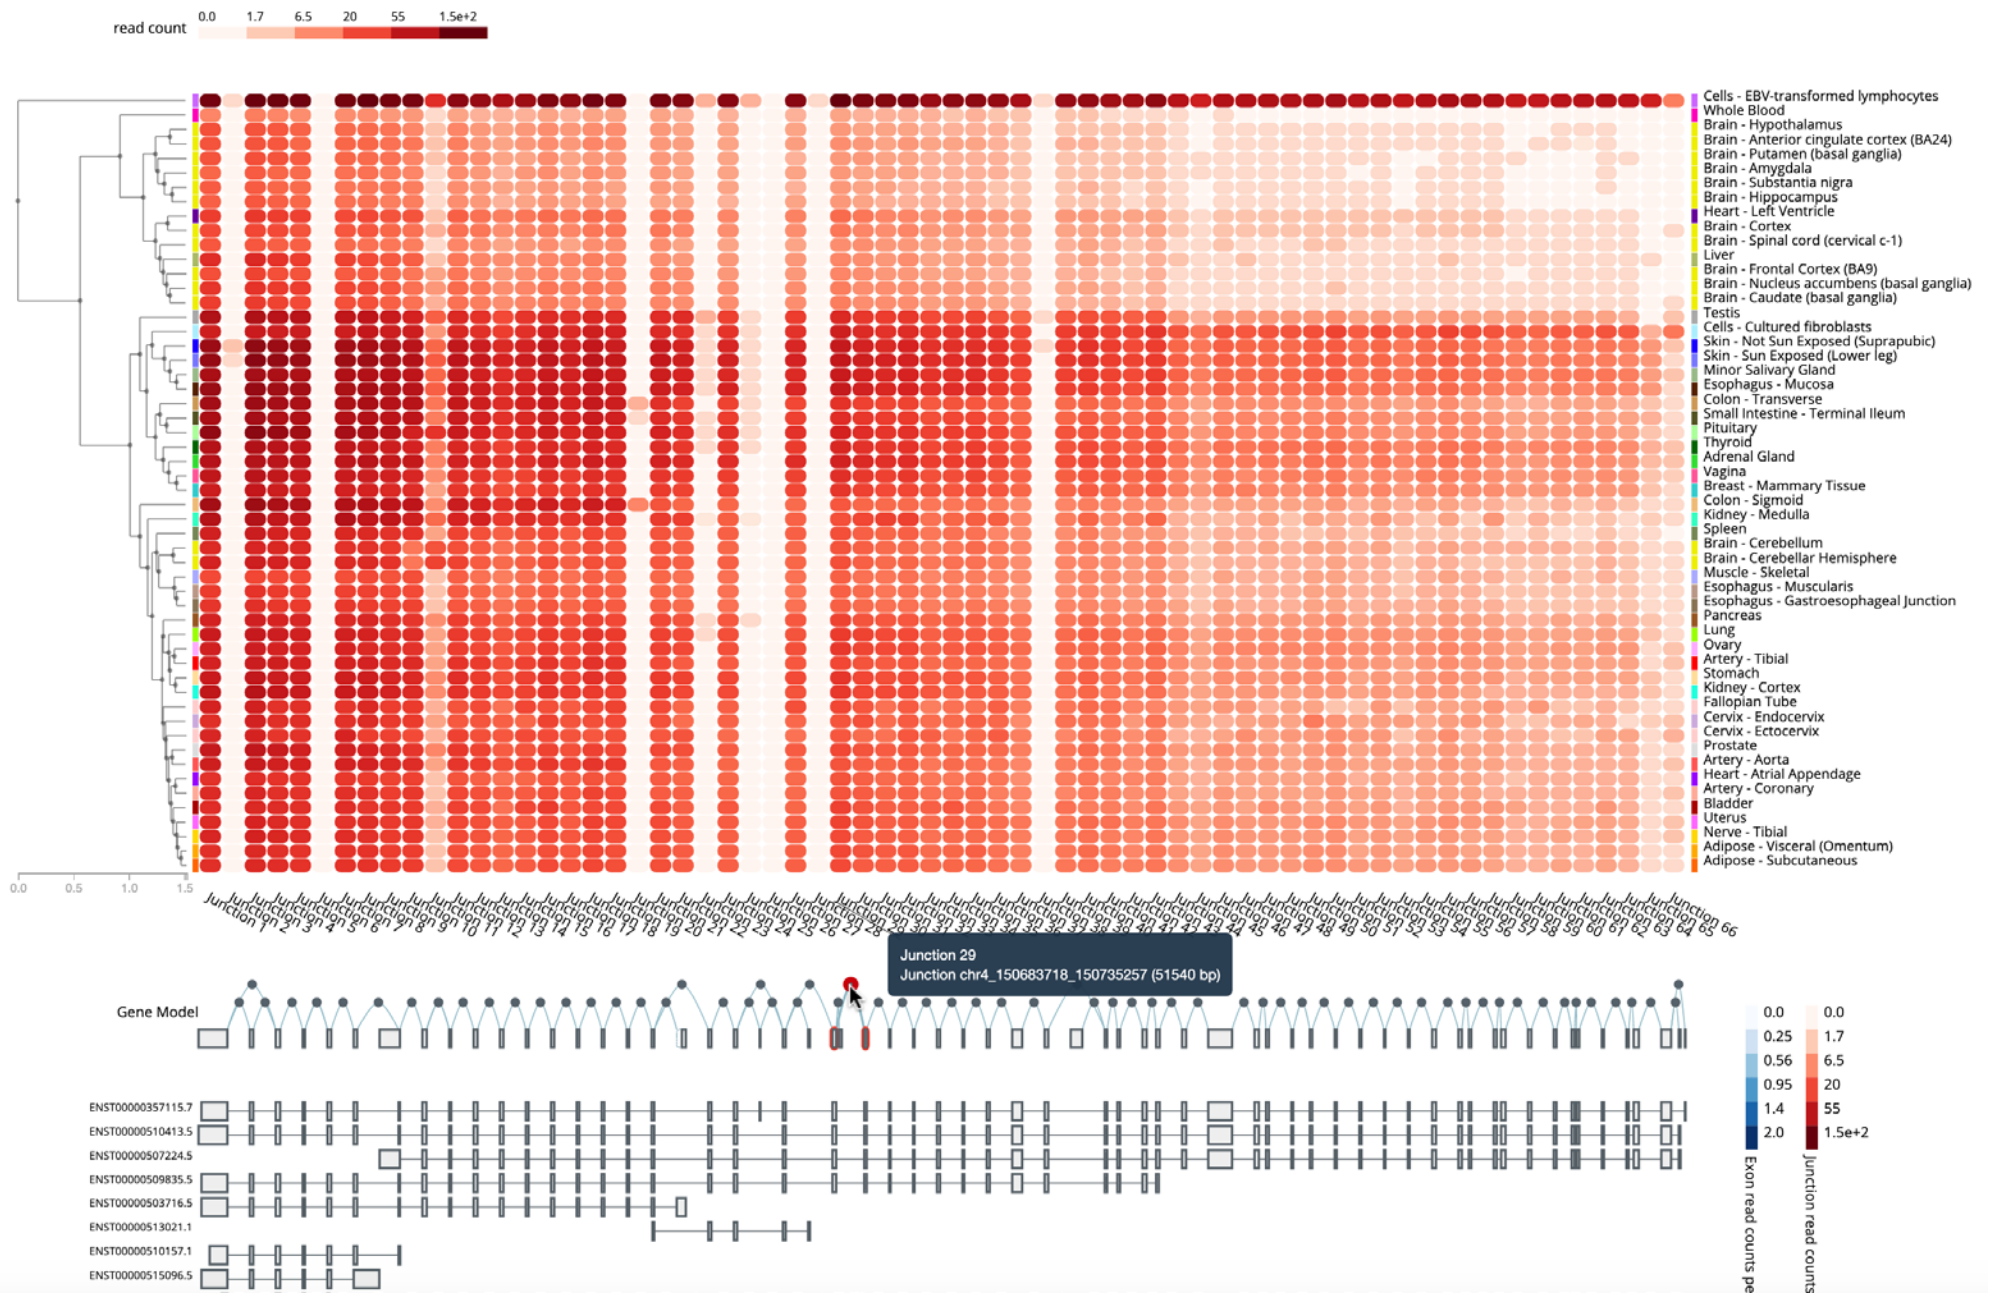

**Supplementary Figure 1:** GTEx junction analysis showing that junction 29, skipping exon 39, is predominantly expressed in all tissues.

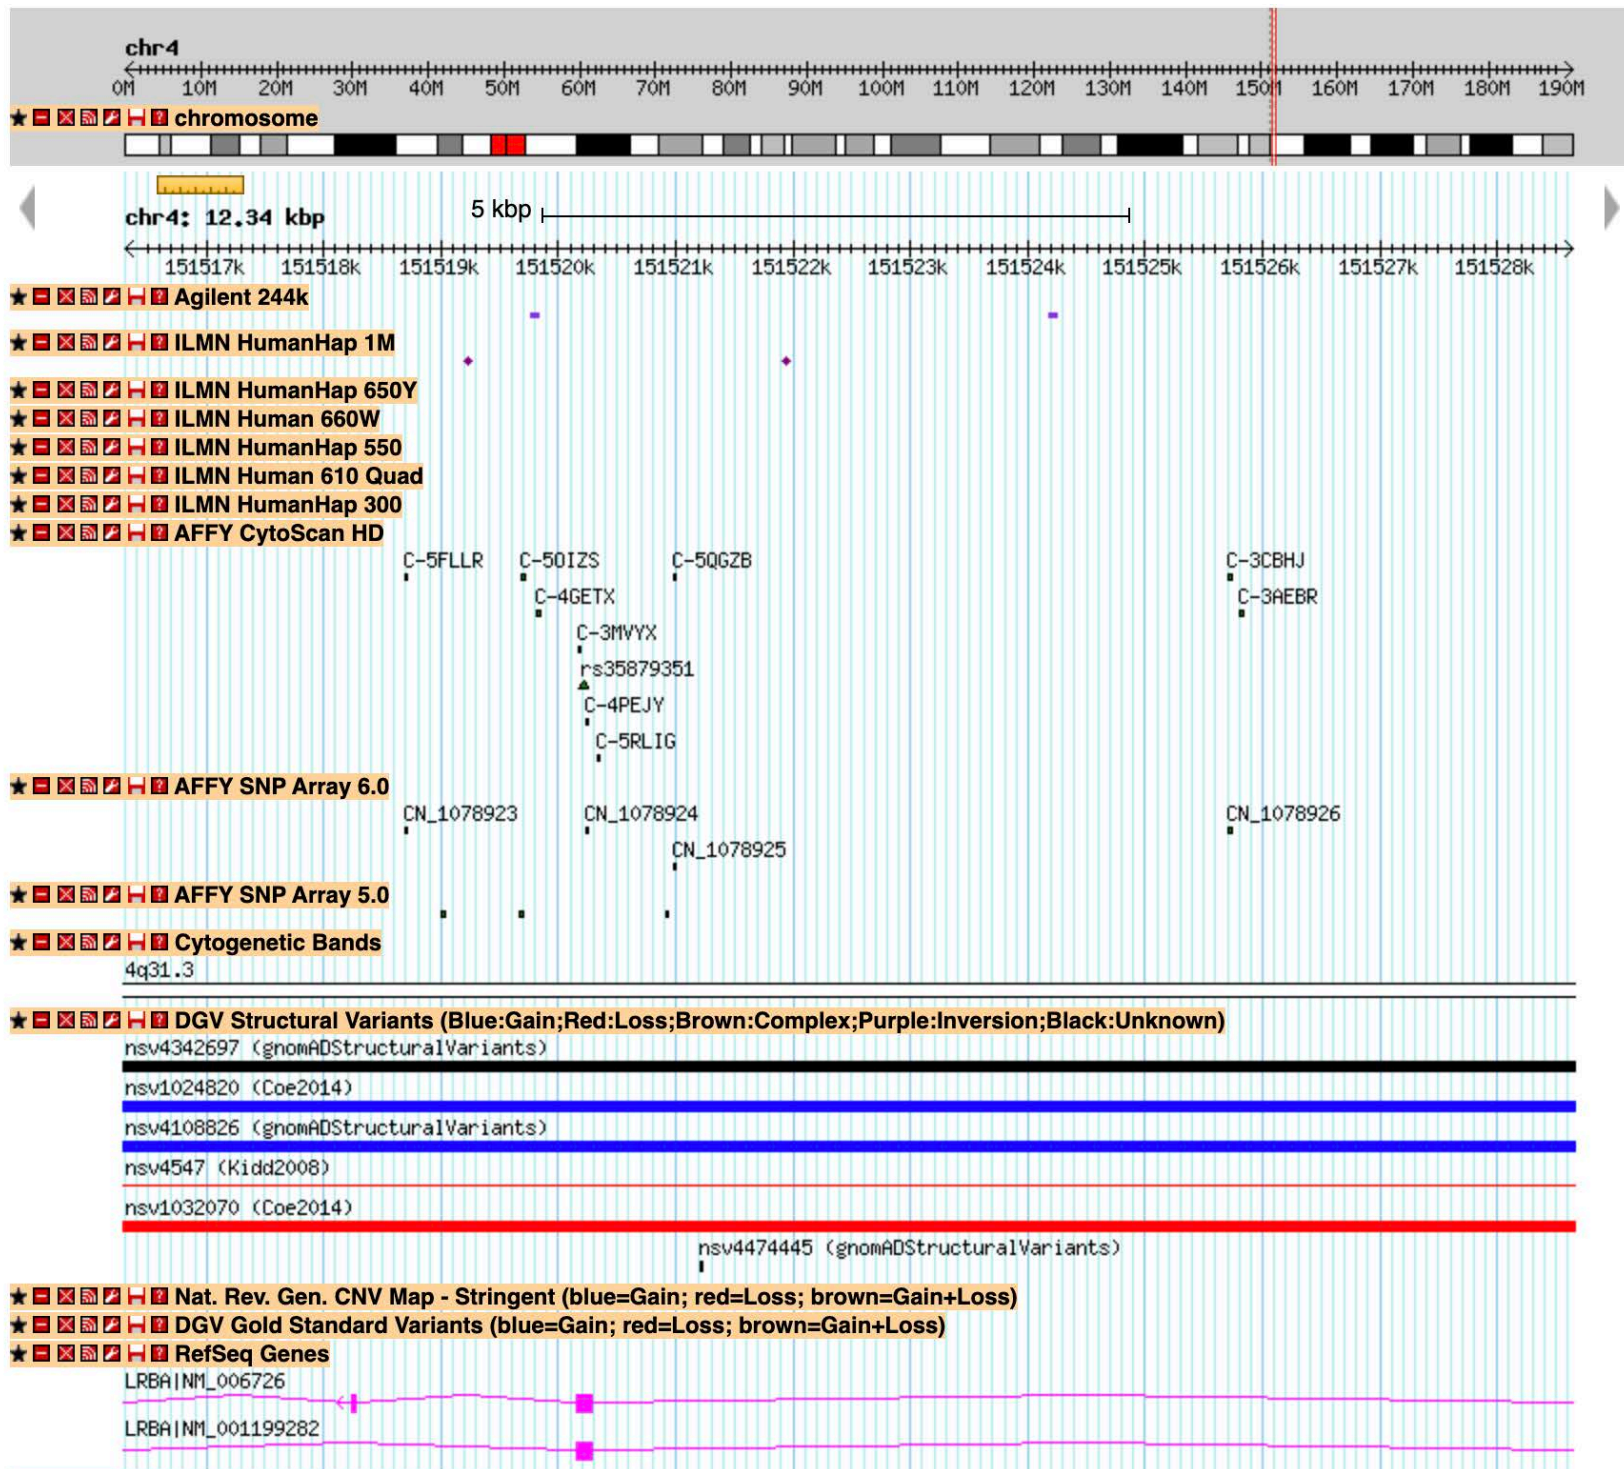

**Supplementary Figure 2:** Probes for different SNP and CGH array platforms in the duplicated genomic region, as provided by DGV.
